# Supplementary material
Source: publisher site journal article supplement (https://italianbotanist.pensoft.net/article/52952/download/suppl/31/)
Supplement: Supplementary file 1

## Sheet: List of wild taxa 
Family	Species name	Red list of threatened plants in Italy (2020)	Red list of threatened vascular plants in Italy (2018)	Italian RedList (2013)	IUCN EuropeRedList (2011)	Italian RedList (1997)	Italian RedList (1992)	Annex II 92/43/EEC	Annex IV 92/43/EEC	Annex V 92/43/EEC	BernConv (1979)	Endemism	ITPGRFA Annex I
Amaryllidaceae	Allium commutatum Guss.	LC
Amaryllidaceae	Allium lusitanicum Lam.
Amaryllidaceae	Allium oleraceum L. subsp. oleraceum
Amaryllidaceae	Allium sphaerocephalon L. subsp. sphaerocephalon
Apiaceae	Bubon macedonicum L.	CR		CR		VU	R
Apiaceae	Coristospermum cuneifolium (Guss.) Bertol.		LC									Apennine	x
Apiaceae	Crithmum maritimum L.
Apiaceae	Siler montanum Crantz subsp. siculum (Spreng.) Iamonico, Bartolucci & F.Conti		LC									Italy Sicily
Apiaceae	Trinia dalechampii (Ten.) Janch.
Aquifoliaceae	Ilex aquifolium L.
Asparagaceae	Muscari neglectum Guss. ex Ten.
Asphodelaceae	Asphodeline lutea (L.) Rchb.
Asphodelaceae	Asphodelus macrocarpus Parl. subsp. macrocarpus
Asteraceae	Achillea barrelieri (Ten.) Sch. Bip. subsp. barrelieri		LC									Apennine
Asteraceae	Achillea tenorei Grande		LC									Apennine
Asteraceae	Artemisia eriantha Ten.					VU	V			x
Asteraceae	Carduus chrysacanthus Ten.
Asteraceae	Centaurea ceratophylla Ten. subsp. ceratophylla		LC									Apennine
Asteraceae	Centaurea tenoreana Willk.		LC			LR						Majella
Asteraceae	Crepis magellensis F. Conti & Uzunov		NT									Majella
Asteraceae	Crepis pygmaea L.
Asteraceae	Doronicum columnae Ten.
Asteraceae	Erigeron epiroticus (Vierh.) Halácsy
Asteraceae	Eupatorium cannabinum L. subsp. cannabinum
Asteraceae	Helichrysum italicum (Roth) G.Don subsp. italicum
Asteraceae	Jacobaea alpina (L.) Moench subsp. samnitum (Nyman) Peruzzi		LC									Italy
Asteraceae	Jacobaea vulgaris subsp. gotlandica (Neuman) B. Nord.	NT						x
Asteraceae	Jurinea mollis (L.) Rchb. subsp. mollis
Asteraceae	Klasea lycopifolia (Vill.) Á.Löve & D.Löve							x
Asteraceae	Leontopodium nivale (Ten.) Huet ex Hand.-Mazz.	NT				LR
Asteraceae	Mycelis muralis (L.) Dumort.
Asteraceae	Omalotheca diminuta (Braun-Blanq.) Bartolucci & Galasso
Asteraceae	Scorzoneroides montana (Lam.) Holub subsp. breviscapa (DC.) Greuter		LC									Apennine
Asteraceae	Tragopogon porrifolius L.
Boraginaceae	Cynoglossum magellense Ten.		LC									Apennine
Boraginaceae	Myosotis graui Selvi		LC									Apennine
Brassicaceae	Alyssum cuneifolium Ten.					LR						Apennine
Brassicaceae	Alyssum diffusum Ten. subsp. diffusum		LC									Apennine
Brassicaceae	Arabis alpina L. subsp. caucasica (Willd.) Briq.
Brassicaceae	Aurinia sinuata (L.) Griseb.
Brassicaceae	Draba aizoides L. subsp. aizoides
Brassicaceae	Iberis saxatilis L. subsp. saxatilis
Brassicaceae	Isatis apennina Ten. ex Grande												x
Brassicaceae	Isatis tinctoria L. subsp. tinctoria												x
Brassicaceae	Matthiola incana (L.) W.T:Aiton subsp. incana
Brassicaceae	Noccaea stylosa (Ten.) Rchb.		LC									Apennine
Brassicaceae	Phyllolepidum rupestre (Sweet) Trinajstić		NT									Apennine
Campanulaceae	Campanula fragilis Cirillo subsp. cavolinii (Ten.) Damboldt		LC									Italy
Campanulaceae	Campanula rapunculus L.
Campanulaceae	Campanula scheuchzeri Vill. subsp. scheuchzeri
Campanulaceae	Campanula trachelium L. subsp. trachelium
Campanulaceae	Edraianthus graminifolius (L.) A.DC. subsp. graminifolius
Caryophyllaceae	Arenaria bertolonii Fiori	LC										Italy
Caryophyllaceae	Arenaria grandiflora L. subsp. grandiflora
Caryophyllaceae	Cerastium thomasii Ten.		LC			LR						Apennine
Caryophyllaceae	Cerastium tomentosum L.		LC									Apennine
Caryophyllaceae	Drypis spinosa L. subsp. spinosa
Caryophyllaceae	Heliosperma pusillum (Waldst. & Kit.) Rchb. subsp. pusillum
Caryophyllaceae	Sabulina verna (L.) Rchb. subsp. verna
Caryophyllaceae	Silene acaulis (L.) Jacq. subsp. bryoides (Jord.) Nyman
Caryophyllaceae	Silene ciliata Pourr. subsp. graefferi (Guss.) Nyman
Caryophyllaceae	Silene notarisii Ces.		DD									Apennine
Cistaceae	Cistus creticus L. subsp. creticus
Cistaceae	Cistus creticus L. subsp. eriocephalus (Viv.) Greuter & Burdet
Cistaceae	Fumana ericifolia Wallr.
Cistaceae	Helianthemum nummularium (L.) Mill. subsp. obscurum (Čelak.) Holub
Crassulaceae	Petrosedum rupestre (L.) P.V.Heath
Crassulaceae	Sedum album L. subsp. micranthum (Bast. ex DC.) Syme
Crassulaceae	Sedum atratum L.
Crassulaceae	Sedum dasyphyllum L. subsp. dasyphyllum
Crassulaceae	Umbilicus horizontalis (Guss.) DC.
Cyperaceae	Carex kitaibeliana Degen ex Bech.
Cyperaceae	Carex microcarpa Bertol. ex Moris	NT			LC							Italy Sardinia
Cyperaceae	Carex myosuroides Vill.
Cyperaceae	Eriophorum latifolium Hoppe
Dipsacaceae	Lomelosia crenata (Cirillo) Greuter & Burdet subsp. pseudisetensis (Lacaita) Greuter & Burdet		LC									Italy
Dipsacaceae	Lomelosia graminifolia (L.) Greuter & Burdet subsp. graminifolia
Ericaceae	Arctostaphylos uva-ursi (L.) Spreng.
Ericaceae	Orthilia secunda (L.) House
Fabaceae	Anthyllis montana L. subsp. jacquinii (Rchb.f.) Rohlena
Fabaceae	Astragalus aquilanus Anzal.		EN	EN	DD	VU	V	x (priority)			x	Italy	x
Fabaceae	Coronilla valentina L.												x
Fabaceae	Genista pulchella Vis. subsp. aquilana F. Conti & Manzi			CR								Apennine
Fabaceae	Lathyrus clymenum L.												x
Fabaceae	Lathyrus odoratus L.		LC		NT							Italy Sicily	x
Fabaceae	Lathyrus oleraceus Lam.												x
Fabaceae	Ononis rotundifolia L.
Fabaceae	Oxytropis ocrensis F. Conti & Bartolucci		VU*									Apennine
Fabaceae	Trifolium thalii Vill.												x
Gentianaceae	Gentiana cruciata L. subsp. cruciata
Gentianaceae	Gentiana dinarica Beck
Gentianaceae	Gentiana lutea L. subsp. lutea			NT
Gentianaceae	Gentiana orbicularis Schur
Gentianaceae	Gentiana verna L. subsp. verna
Hypericaceae	Hypericum richeri Vill. subsp. richeri
Iridaceae	Chamaeiris lorea (Janka) Peruzzi, F.Conti & Bartolucci												x
Iridaceae	Iris marsica I. Ricci & Colas.		NT	NT	DD	LR	R		x		x	Apennine
Lamiaceae	Melissa officinalis L. subsp. officinalis
Lamiaceae	Phlomis fruticosa L.
Lamiaceae	Salvia officinalis L. subsp. officinalis
Lamiaceae	Teucrium flavum L. subsp. flavum
Lamiaceae	Thymus zygiformis Heinr.Braun var. magellensis (Ronniger) Bartolucci & J.Walter	DD
Lentibulariaceae	Pinguicula fiorii Tammaro & Pace		EN									Majella
Liliaceae	Fritillaria montana Hoppe ex W.D.J.Koch			NT	DD						x
Liliaceae	Lilium martagon L.
Linaceae	Linum alpinum Jacq.
Linaceae	Linum usitatissimum L. subsp. angustifolium (Huds.) Thell.
Linaceae	Linum viscosum L.
Onagraceae	Chamaenerion angustifolium (L.) Scop.
Onagraceae	Chamaenerion dodonaei (Vill.) Schur ex Fuss
Onagraceae	Epilobium hirsutum L.
Orchidaceae	Cypripedium calceolus L.			LC		VU	V	x			x
Orchidaceae	Himantoglossum adriaticum H.Baumann			LC	LC			x
Orchidaceae	Limodorum abortivum (L.) Sw.
Orobanchaceae	Pedicularis hoermanniana K.Malý
Orobanchaceae	Rhinanthus alectorolophus (Scop.) Pollich subsp. alectorolophus
Paeoniaceae	Paeonia officinalis L. subsp. italica N.G.Passal. & Bernardo		LC									Apennine
Papaveraceae	Papaver alpinum L. subsp. alpinum
Pinaceae	Pinus mugo Turra subsp. mugo
Plantaginaceae	Erinus alpinus L.
Plantaginaceae	Linaria alpina (L.) Mill.
Plantaginaceae	Plantago atrata Hoppe subsp. fuscescens (Jord.) Pilg.
Plantaginaceae	Veronica aphylla L. subsp. aphylla
Plumbaginaceae	Armeria gracilis Ten. subsp. majellensis (Boiss.) Arrigoni		LC									Italy
Poaceae	Briza maxima L.
Poaceae	Briza minor L.
Poaceae	Secale strictum (C.Presl) C.Presl subsp. strictum												x
Polygonaceae	Bistorta vivipara (L.) Delarbre
Polygonaceae	Rumex arifolius All.
Primulaceae	Androsace mathildae Levier		LC	LC				x				Apennine
Primulaceae	Androsace villosa L. subsp. villosa
Primulaceae	Androsace vitaliana (L.) Lapeyr. subsp. praetutiana (Buser ex Sünd.) Kress		LC									Apennine
Primulaceae	Primula intricata Gren. & Godr.
Primulaceae	Primula veris L. subsp. columnae (Ten.) Maire & Petitm.
Primulaceae	Soldanella minima Hoppe subsp. samnitica Cristof. & Pignatti		NT									Majella
Ranunculaceae	Actaea spicata L.
Ranunculaceae	Adonis distorta Ten.		EN	EN	DD	LR	R	x			x	Apennine
Ranunculaceae	Aquilegia dumeticolaJord.
Ranunculaceae	Aquilegia magellensis F. Conti & Soldano		NT			LR	R					Majella
Ranunculaceae	Clematis vitalba L.
Ranunculaceae	Pulsatilla alpina (L.) Delarbre subsp. millefoliata (Bertol.) D.M.Moser
Ranunculaceae	Pulsatilla montana (Hoppe) Rchb. subsp. montana
Ranunculaceae	Ranunculus magellensis Ten.		DD									Apennine
Ranunculaceae	Ranunculus seguieri Vill. subsp. seguieri
Ranunculaceae	Thalictrum aquilegiifolium L. subsp. aquilegiifolium
Ranunculaceae	Thalictrum simplex L. subsp. simplex
Ranunculaceae	Trollius europaeus L.
Rosaceae	Dryas octopetala L. subsp. octopetala
Rosaceae	Geum molle Vis. & Pančić
Rosaceae	Potentilla crantzii (Crantz) Beck ex Fritsch subsp. crantzii
Rosaceae	Pyracantha coccinea M.Roem.
Rosaceae	Sorbus aria (L.) Crantz
Rosaceae	Sorbus chamaemespilus (L.) Crantz
Rosaceae	Sorbus mougeotii Soy.-Will. & Godr.
Rubiaceae	Galium corrudifolium Vill.
Rubiaceae	Galium magellense Ten.		LC									Apennine
Salicaceae	Salix retusa L.
Saxifragaceae	Saxifraga adscendens L. subsp. adscendens
Saxifragaceae	Saxifraga caesia L.
Saxifragaceae	Saxifraga callosa Sm. subsp. callosa
Saxifragaceae	Saxifraga exarata Vill. subsp. ampullacea (Ten.) D.A.Webb		LC									Apennine
Saxifragaceae	Saxifraga italica D.A.Webb		NT									Apennine
Saxifragaceae	Saxifraga oppositifolia L. subsp. speciosa (Dörfl. & Hayek) Engl. & Irmsh.		LC									Apennine
Saxifragaceae	Saxifraga paniculata Mill.
Saxifragaceae	Saxifraga rotundifolia L. subsp. rotundifolia
Solanaceae	Atropa bella-donna L.
Typhaceae	Typha minima Funk ex Hoppe			EN							x
Valerianaceae	Centranthus ruber (L.) DC. subsp. ruber
Valerianaceae	Valeriana montana L.
Valerianaceae	Valeriana saliunca All.
Viburnaceae	Viburnum lantana L.

## Sheet: List of agronomic landraces
Family	Species name	Landraces
Fabaceae	Phaseolus vulgaris	40 giorni
Fabaceae	Phaseolus vulgaris	a caffè
Fabaceae	Phaseolus vulgaris	aquilano
Fabaceae	Phaseolus vulgaris	suocea e nuora
Fabaceae	Vicia faba	mezza fava
Poaceae	Triticum aestivum	solina
Poaceae	Triticum aestivum	casorella
Poaceae	Triticum dicoccon	farro del Sangro
Poaceae	Triticum dicoccon	levese
Poaceae	Triticum durum	rosciola
Poaceae	Triticum durum	ruscia
Poaceae	Triticum durum	marzuolo

## Sheet: References
Inventory information	Fields	Explanation	Main sources of information
Main taxonomic information	Family, Species name	Taxonomic information including higher ranks (family and genus), specific, infraspecific names	An updated checklist of the vascular flora native to Italy (Bartolucci et al. 2018); An annotated checklist of the vascular flora of Majella National Park (Central Italy) (Conti et al. 2019).
Distribution	Endemism	Endemic (Italy, Apennine or Majella)	An updated checklist of the vascular flora native to Italy (Bartolucci et al. 2018); An annotated checklist of the vascular flora of Majella National Park (Central Italy) (Conti et al. 2019).
Protection degree	Red list of threatened vascular plants in Italy (2020), Red Listing plants under full national responsibility (2018), IUCN EuropRedList (2011), ItalianRedList (1997), ItalianRedList (1997) Sicilia, ItalianRedList (1997) Sardegna, Italian RedList (1992), RedList (2013), Annex II 92/43/EEC, Annex IV 92/43/EEC, Annex V 92/43/EEC, BernConv (1979).	Whether the taxon is under protection (or was under protection) for the National and European Red Lists, the Directive 92/43/EEC or the Bern Convention. The threatened status at National and European scale is indicated by the IUCN categories.	Red list of threatened vascular plants in Italy (Orsenigo et al., 2020); Red Listing plants under full national responsibility (Orsenigo et al., 2018); IUCN Red List (Bilz et al. 2011); IUCN Red List of Threatened Species (2012), http://www.iucnredlist.org; Italian Red Lists (Conti et al. 1992, 1997; Rossi et al., 2013); Directive 92/43/EEC (European Commission 2007); Bern Convention (Council of …
Crop Wild Relatives Priority	ITPGRFA Annex I	Whether the taxon is considered priority because relative to a crop included in the Annex I of the International Treaty on Plant Genetic Resources for Food and Agriculture	International Treaty on Plant Genetic Resources for Food and Agriculture (ITPGRFA, FAO 2009 ); A Prioritized Inventory of Crop Wild Relatives and Wild Harvested Plants of Italy (Landucci et al., 2014).

## Sheet: Codes
Red List Categories
IUCN 1978 (used in Conti et al. 1992)		IUCN 1994 (used in Conti et al. 1997)		IUCN 2001 (used in Bilz et al. 2011; Rossi et al., 2013 and Orsenigo et al., 2018, 2020)
Ex	Extinct	EX	Extinct	EX	Extinct
E	Endangered	EW	Extinct in Wild	EW	Extinct in Wild
V	Vulnerable	CR	Critically endangered	CR	Critically endangered
R	Rare	EN	Endangered	EN	Endangered
I	Indeterminate	LR	Lower Risk	VU	Vulnerable
				NT	Near Threatened
				LC	Least Concern
				DD	Data Deficit
International Treaty on Plant Genetic Resources for Food and Agriculture (ITPGRFA) Annex I
Code	Explanation
x	The taxon is native and is relative to a crop indicated in the Annex I of the ITPGRFA.
